# Supplementary material for: Drivers of the dive response in trained harbour porpoises(Phocoena phocoena)
Source: Oxford University Press journal article supplement (doi:10.1242/jeb.208637), 2019-01-01
Supplement: jeb208637supp.pdf [file jeb208637supp.pdf]

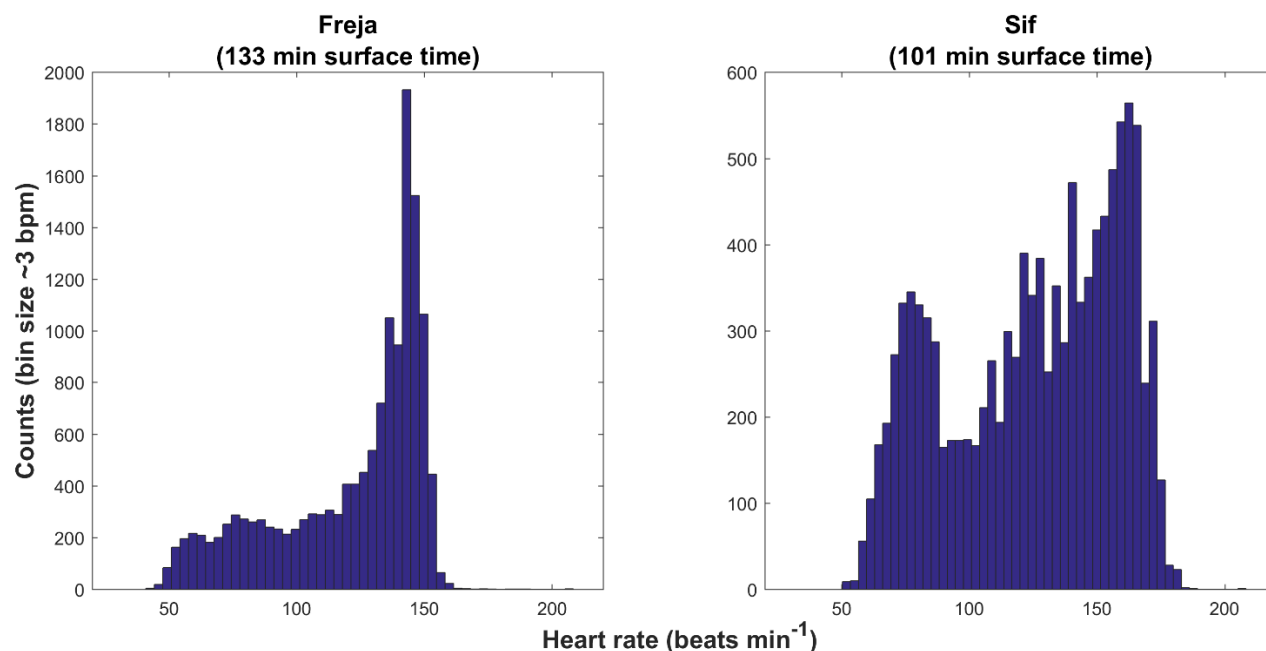

**Fig S1. Bimodal  $f_H$  of the harbour porpoises.** Histograms of  $f_H$  during surface intervals (30 seconds preceding and 30 seconds following tasks) for each porpoise. To find the most prevalent  $f_H$  of tachycardia and bradycardia, we found the mode of  $f_H$  below and above 100 beats  $\text{min}^{-1}$ . The high  $f_H$  mode was 143 (Freja) and 162 (Sif) beats  $\text{min}^{-1}$ , and the low  $f_H$  mode was 76 (Freja) and 77 (Sif) beats  $\text{min}^{-1}$ . 50 bins and  $f_H$  ranges of 41-208 (Freja) and 50-208 (Sif) beats  $\text{min}^{-1}$  result in bin sizes of  $\sim 3$  beats  $\text{min}^{-1}$ .

**Table S1.** Breath-hold duration and  $f_H$  parameters of tasks performed. Calculations of  $f_H$  are based on the initial 15 seconds of the tasks, except beaching (B) which are based on the 15 second beaching period.

| Animal | Task | n  | Duration<br>(seconds)<br>mean | Minimum $f_H$<br>(beats $\text{min}^{-1}$ )<br>mean $\pm$ s.e.m. | Mean $f_H$<br>(beats $\text{min}^{-1}$ )<br>mean $\pm$ s.e.m. | Median $f_H$<br>(beats $\text{min}^{-1}$ )<br>mean $\pm$ s.e.m. | Lower quartile $f_H$<br>(beats $\text{min}^{-1}$ )<br>mean $\pm$ s.e.m. |
|--------|------|----|-------------------------------|------------------------------------------------------------------|---------------------------------------------------------------|-----------------------------------------------------------------|-------------------------------------------------------------------------|
| Freja  | DSw  | 24 | 22.1                          | 87.1 $\pm$ 3.6                                                   | 121.7 $\pm$ 2.4                                               | 123.6 $\pm$ 2.9                                                 | 108.8 $\pm$ 3.3                                                         |
|        | VSw  | 27 | 19.1                          | 66.3 $\pm$ 1.2                                                   | 111.4 $\pm$ 1.9                                               | 116.4 $\pm$ 3.1                                                 | 84.6 $\pm$ 2.8                                                          |
|        | ST   | 24 | 20.1                          | 54.0 $\pm$ 1.1                                                   | 85.9 $\pm$ 2.0                                                | 66.7 $\pm$ 2.0                                                  | 58.8 $\pm$ 1.5                                                          |
|        | DSt  | 26 | 20.0                          | 68.7 $\pm$ 2.5                                                   | 106.9 $\pm$ 2.5                                               | 102.0 $\pm$ 3.5                                                 | 84.0 $\pm$ 3.1                                                          |
|        | VSt  | 27 | 20.3                          | 69.2 $\pm$ 1.6                                                   | 114.1 $\pm$ 2.1                                               | 118.8 $\pm$ 3.3                                                 | 94.4 $\pm$ 3.0                                                          |
|        | B    | 5  | 17.4 (40.4)                   | 59.7 $\pm$ 1.8                                                   | 92.3 $\pm$ 1.1                                                | 92.0 $\pm$ 2.8                                                  | 78.5 $\pm$ 2.9                                                          |
| Sif    | DSw  | 12 | 16.5                          | 127.8 $\pm$ 4.3                                                  | 161.0 $\pm$ 2.4                                               | 165.3 $\pm$ 2.3                                                 | 151.8 $\pm$ 3.5                                                         |
|        | VSw  | 15 | 17.3                          | 97.0 $\pm$ 3.3                                                   | 139.4 $\pm$ 3.0                                               | 145.8 $\pm$ 3.7                                                 | 121.0 $\pm$ 3.1                                                         |
|        | ST   | 25 | 20.6                          | 56.8 $\pm$ 0.6                                                   | 87.4 $\pm$ 1.9                                                | 74.1 $\pm$ 1.2                                                  | 63.5 $\pm$ 0.7                                                          |
|        | DSt  | 24 | 19.8                          | 57.1 $\pm$ 0.7                                                   | 83.1 $\pm$ 2.1                                                | 72.1 $\pm$ 1.8                                                  | 63.2 $\pm$ 0.8                                                          |
|        | VSt  | 25 | 19.4                          | 78.5 $\pm$ 1.0                                                   | 127.4 $\pm$ 1.8                                               | 134.1 $\pm$ 2.8                                                 | 97.0 $\pm$ 2.2                                                          |

**Table S2.** Results (p-values) from Games-Howell post hoc analysis of lower quartile  $f_H$  to examine which task  $f_H$  differ and which group. Symbols: ns (not significant), \* ( $p \leq 0.05$ ), \*\* ( $p \leq 0.01$ ), \*\*\* ( $p \leq 0.001$ ).

|     | Freja |     |     |     | Sif |     |     |     |
|-----|-------|-----|-----|-----|-----|-----|-----|-----|
|     | Dsw   | VSw | DSt | VSt | Dsw | VSw | DSt | VSt |
| VSw | ***   |     |     |     | *** |     |     |     |
| DSt | ***   | ns  |     |     | *** | *** |     |     |
| VSt | *     | ns  | ns  |     | *** | *** | *** |     |
| ST  | ***   | *** | *** | *** | *** | *** | ns  | *** |
